# Supplementary material
Source: PubMed Central journal article supplement (PMC8492857)
Supplement: 11357_2021_354_MOESM2_ESM.pdf [file 11357_2021_354_MOESM2_ESM.pdf]

**Supplementary Table 1:** Medial prefrontal cortex (top) & striatal (bottom) metabolite levels (mM) in adult male & female Tat-tg mice. Shown are means, standard deviations and Ns along with results from Two-way ANOVAs. Significant effects are shown in **bold text**.

| <b>MPFC</b>     | Old males        | Old females      | Young males      | Young females     | Age ANOVA $F; p$                                             | Sex ANOVA $F; p$                                            |
|-----------------|------------------|------------------|------------------|-------------------|--------------------------------------------------------------|-------------------------------------------------------------|
| Asp             | 3.14 ± 1.00 (10) | 3.71 ± 1.35 (13) | 3.76 ± 1.15 (10) | 4.20 ± 1.49 (10)  | $F_{(1,39)}=2.03$ ; NS                                       | $F_{(1,39)}=1.66$ ; NS                                      |
| GABA            | 1.86 ± 0.58 (10) | 1.84 ± 0.42 (13) | 2.20 ± 0.53 (10) | 2.46 ± 0.74 (10)  | <b><math>F_{(1,39)}=7.71</math>; <math>p=0.008</math></b>    | $F_{(1,39)}=0.50$ ; NS                                      |
| Gln             | 3.68 ± 0.70 (9)  | 3.32 ± 0.72 (12) | 3.50 ± 0.85 (10) | 3.85 ± 0.79 (10)  | $F_{(1,37)}=0.56$ ; NS                                       | $F_{(1,37)}=0.00$ ; NS                                      |
| Glu             | 12.5 ± 1.96 (10) | 12.4 ± 1.80 (13) | 15.7 ± 1.26 (10) | 14.24 ± 1.89 (10) | <b><math>F_{(1,39)}=21.6</math>; <math>p&lt;0.001</math></b> | $F_{(1,39)}=2.00$ ; NS                                      |
| GSH             | 2.71 ± 0.39 (10) | 2.10 ± 0.45 (13) | 2.48 ± 0.43 (10) | 2.51 ± 0.59 (10)  | $F_{(1,39)}=0.37$ ; NS                                       | <b><math>F_{(1,39)}=4.09</math>; <math>p=0.050^*</math></b> |
| ml              | 6.72 ± 1.04 (10) | 7.11 ± 1.57 (13) | 7.39 ± 1.00 (10) | 6.92 ± 1.47 (10)  | $F_{(1,39)}=0.35$ ; NS                                       | $F_{(1,39)}=0.01$ ; NS                                      |
| NAA             | 9.06 ± 1.46 (10) | 8.78 ± 1.12 (13) | 9.27 ± 0.86 (10) | 9.59 ± 1.02 (10)  | $F_{(1,39)}=2.14$ ; NS                                       | $F_{(1,39)}=0.00$ ; NS                                      |
| Tau             | 14.8 ± 2.60 (10) | 13.5 ± 2.23 (13) | 17.3 ± 1.48 (10) | 15.5 ± 2.04 (10)  | <b><math>F_{(1,39)}=11.7</math>; <math>p=0.002</math></b>    | <b><math>F_{(1,39)}=5.61</math>; <math>p=0.023</math></b>   |
| tCho            | 2.51 ± 0.90 (10) | 2.95 ± 0.76 (13) | 3.09 ± 0.63 (10) | 2.91 ± 0.88 (10)  | $F_{(1,39)}=1.27$ ; NS                                       | $F_{(1,39)}=0.29$ ; NS                                      |
| tCr             | 9.98 ± 1.42 (10) | 9.08 ± 1.01 (13) | 10.1 ± 0.89 (10) | 9.83 ± 0.89 (10)  | $F_{(1,39)}=1.91$ ; NS                                       | $F_{(1,39)}=3.41$ ; NS                                      |
| <b>Striatum</b> |                  |                  |                  |                   |                                                              |                                                             |
| Asp             | 2.02 ± 1.11 (10) | 2.20 ± 0.72 (11) | 2.96 ± 1.05 (7)  | 2.26 ± 0.80 (5)   | $F_{(1,29)}=2.18$ ; NS                                       | $F_{(1,29)}=0.59$ ; NS                                      |
| GABA            | 1.61 ± 0.66 (10) | 2.10 ± 0.64 (13) | 2.28 ± 0.52 (10) | 2.41 ± 0.90 (10)  | <b><math>F_{(1,38)}=5.33</math>; <math>p=0.027</math></b>    | $F_{(1,38)}=2.20$ ; NS                                      |
| Gln             | 4.07 ± 0.51 (9)  | 4.16 ± 1.63 (13) | 3.67 ± 0.41 (10) | 4.03 ± 0.60 (10)  | $F_{(1,38)}=0.70$ ; NS                                       | $F_{(1,38)}=0.51$ ; NS                                      |
| Glu             | 8.22 ± 1.03 (10) | 7.92 ± 1.74 (13) | 8.70 ± 0.93 (10) | 8.16 ± 0.82 (10)  | $F_{(1,39)}=0.92$ ; NS                                       | $F_{(1,39)}=1.20$ ; NS                                      |
| GSH             | 1.99 ± 0.36 (10) | 1.83 ± 0.60 (13) | 2.26 ± 0.45 (10) | 2.03 ± 0.60 (10)  | $F_{(1,39)}=2.16$ ; NS                                       | $F_{(1,39)}=1.46$ ; NS                                      |
| ml              | 4.82 ± 0.73 (10) | 4.75 ± 1.41 (13) | 4.98 ± 1.14 (10) | 5.47 ± 0.69 (10)  | $F_{(1,39)}=1.81$ ; NS                                       | $F_{(1,39)}=0.41$ ; NS                                      |
| NAA             | 5.72 ± 0.53 (10) | 5.41 ± 1.43 (13) | 5.74 ± 0.63 (10) | 5.92 ± 0.73 (10)  | $F_{(1,39)}=0.81$ ; NS                                       | $F_{(1,39)}=0.05$ ; NS                                      |
| Tau             | 17.0 ± 1.15 (10) | 14.9 ± 3.39 (13) | 18.1 ± 1.52 (10) | 17.2 ± 1.62 (10)  | <b><math>F_{(1,39)}=6.37</math>; <math>p=0.016</math></b>    | <b><math>F_{(1,39)}=4.92</math>; <math>p=0.033</math></b>   |
| tCho            | 2.06 ± 0.36 (10) | 2.37 ± 0.62 (13) | 2.32 ± 0.37 (10) | 2.35 ± 0.66 (10)  | $F_{(1,39)}=0.53$ ; NS                                       | $F_{(1,39)}=1.12$ ; NS                                      |
| tCr             | 8.47 ± 0.57 (10) | 7.55 ± 1.91 (13) | 8.04 ± 0.95 (10) | 8.02 ± 0.52 (10)  | $F_{(1,39)}=0.00$ ; NS                                       | $F_{(1,39)}=1.59$ ; NS                                      |

**Legend:** Asp = Aspartate; GABA =  $\gamma$ -aminobutyric acid; Gln = glutamine; Glu = glutamate; GSH = glutathione; mM = millimolar; ml = myo-inositol; MPFC = medial prefrontal cortex; NAA = N-acetylaspartate; NS = nonsignificant; Tau = taurine; tCho = choline + phosphocholine; tCr = creatine + phosphocreatine. \*Age x Sex Interaction effect:  $F_{(1,39)}=4.88$ ,  $P=0.033$ .
